# Supplementary material
Source: Springer Nature journal article supplement (https://www.springermedizin.de/resource/supplementary/12933_2011_358_MOESM2_ESM.pdf/9538236)

A. Risk of Death From Total CVD

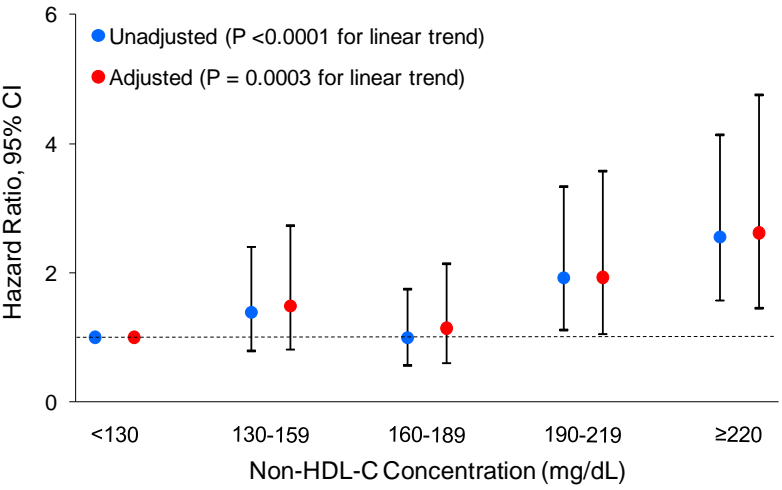

B. Risk of Death From IHD

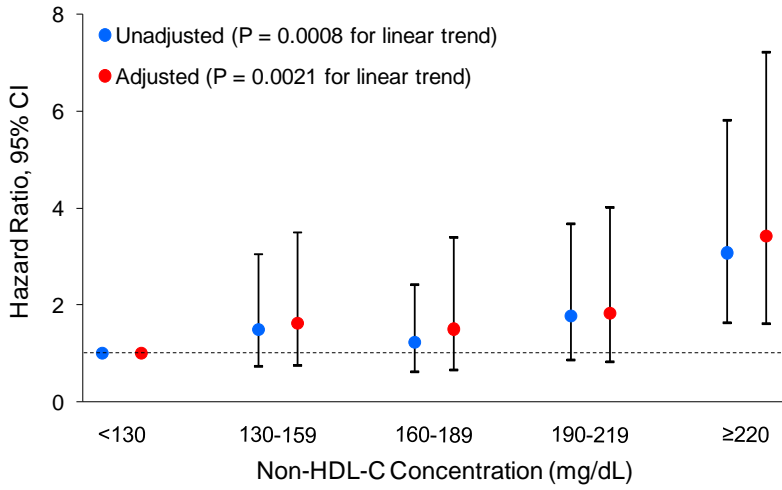

C. Risk of Death From Stroke

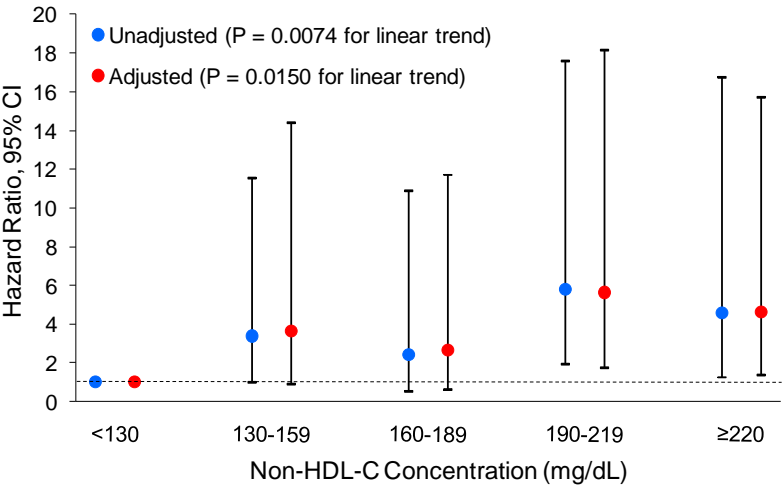

D. Risk of Death From Other CVD

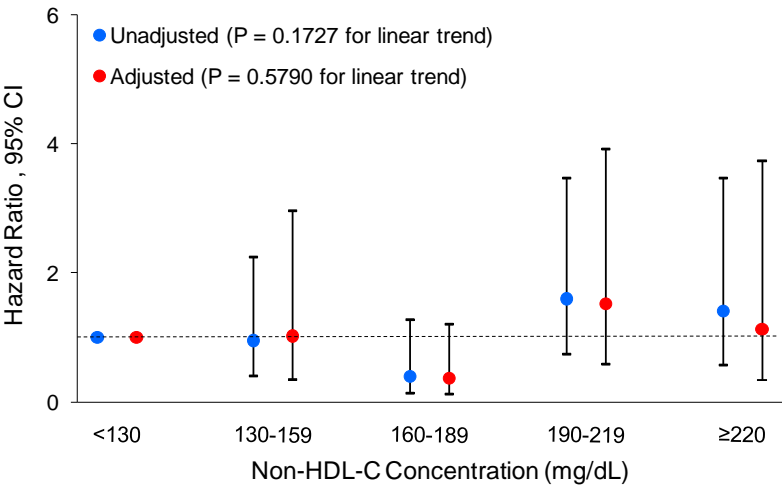

Supplement: MOESM2 [file 9538236]
